# Supplementary material
Source: ML conference proceedings conference paper supplement (https://openreview.net/forum?id=A9jXG3FUMT)
Supplement: supplementary_material [file slagsheatmaps.pdf › supplementaries/slagsheatmaps.pdf]

|               |     | BA ↑ |     |     |     |     |     |     |     |     |     |     |     |     |     |     |     |     |     |     |     |     |     |     |     |  |  |  |  |
|---------------|-----|------|-----|-----|-----|-----|-----|-----|-----|-----|-----|-----|-----|-----|-----|-----|-----|-----|-----|-----|-----|-----|-----|-----|-----|--|--|--|--|
| ATFNet        |     | 0.0  | 0.1 | 0.0 | 0.0 | 0.1 | 0.4 | 0.0 | 0.7 | 0.0 | 0.0 | 0.0 | 0.4 | 0.0 | 0.0 | 0.0 | 0.1 | 0.0 | 0.4 | 0.0 | 0.8 | 0.0 | 0.1 | 0.6 | 0.1 |  |  |  |  |
| AdaWaveNet    | 1.0 |      | 0.9 | 0.5 | 0.5 | 0.6 | 1.0 | 0.7 | 0.9 | 0.4 | 1.0 | 0.2 | 1.0 | 0.7 | 0.8 | 0.7 | 0.7 | 0.4 | 1.0 | 0.3 | 1.0 | 0.2 | 0.8 | 1.0 | 0.9 |  |  |  |  |
| EEGConformer  | 0.8 | 0.1  |     | 0.0 | 0.2 | 0.4 | 1.0 | 0.0 | 0.8 | 0.1 | 0.3 | 0.0 | 1.0 | 0.0 | 0.0 | 0.0 | 0.0 | 0.0 | 0.8 | 0.0 | 1.0 | 0.0 | 0.1 | 1.0 | 0.3 |  |  |  |  |
| EEGMamba      | 1.0 | 0.5  | 1.0 |     | 0.6 | 0.7 | 1.0 | 0.8 | 0.9 | 0.2 | 0.8 | 0.3 | 1.0 | 1.0 | 0.8 | 1.0 | 0.9 | 0.6 | 1.0 | 0.8 | 1.0 | 0.1 | 1.0 | 1.0 | 0.9 |  |  |  |  |
| FAPEX-Base    | 1.0 | 0.5  | 0.8 | 0.4 |     | 1.0 | 0.8 | 0.7 | 1.0 | 0.5 | 0.9 | 0.4 | 0.8 | 0.6 | 0.7 | 0.7 | 0.6 | 0.6 | 0.8 | 0.6 | 1.0 | 0.4 | 0.6 | 0.8 | 0.8 |  |  |  |  |
| FAPEX-Small   | 0.9 | 0.4  | 0.6 | 0.3 | 0.0 |     | 0.7 | 0.5 | 1.0 | 0.4 | 0.5 | 0.3 | 0.7 | 0.3 | 0.5 | 0.6 | 0.3 | 0.3 | 0.7 | 0.5 | 0.9 | 0.3 | 0.4 | 0.6 | 0.6 |  |  |  |  |
| FreTS         | 0.5 | 0.0  | 0.0 | 0.0 | 0.2 | 0.3 |     | 0.0 | 0.5 | 0.0 | 0.2 | 0.0 |     | 0.0 | 0.0 | 0.0 | 0.0 | 0.0 | 0.1 | 1.0 | 0.8 | 0.0 | 0.0 | 0.1 | 0.0 |  |  |  |  |
| MRConv        | 1.0 | 0.2  | 1.0 | 0.2 | 0.3 | 0.5 | 1.0 |     | 0.9 | 0.4 | 0.8 | 0.3 | 1.0 | 0.3 |     | 0.9 | 0.2 | 0.0 | 1.0 | 0.0 | 1.0 | 0.1 | 0.5 | 1.0 | 1.0 |  |  |  |  |
| MTST          | 0.3 | 0.1  | 0.2 | 0.1 | 0.0 | 0.0 | 0.5 | 0.1 |     | 0.1 | 0.1 | 0.1 | 0.5 | 0.1 | 0.1 | 0.1 | 0.1 | 0.1 | 0.3 | 0.1 | 0.4 | 0.1 | 0.1 | 0.4 | 0.1 |  |  |  |  |
| Medformer     | 1.0 | 0.6  | 0.9 | 0.8 | 0.5 | 0.6 | 1.0 | 0.6 | 0.9 |     | 1.0 | 0.1 | 1.0 | 0.8 | 0.6 | 0.7 | 0.6 | 0.4 | 0.9 | 0.4 | 1.0 | 0.5 | 0.7 | 0.9 | 0.8 |  |  |  |  |
| ModernTCN     | 1.0 | 0.0  | 0.7 | 0.2 | 0.1 | 0.5 | 0.8 | 0.2 | 0.9 | 0.0 |     | 0.0 | 0.8 | 0.3 | 0.2 | 0.4 | 0.4 | 0.2 | 0.7 | 0.1 | 1.0 | 0.2 | 0.6 | 0.8 | 0.4 |  |  |  |  |
| MultiresNet   | 1.0 | 0.8  | 1.0 | 0.7 | 0.6 | 0.7 | 1.0 | 0.7 | 0.9 | 0.9 | 1.0 |     | 1.0 | 0.8 | 0.6 | 1.0 | 0.7 | 0.6 | 1.0 | 0.5 | 1.0 | 0.7 | 0.7 | 1.0 | 1.0 |  |  |  |  |
| NFM           | 0.5 | 0.0  | 0.0 | 0.0 | 0.2 | 0.3 |     | 0.0 | 0.5 | 0.0 | 0.2 | 0.0 |     | 0.0 | 0.0 | 0.0 | 0.0 | 0.0 | 0.1 | 1.0 | 0.8 | 0.0 | 0.0 | 0.1 | 0.0 |  |  |  |  |
| Nonformer     | 1.0 | 0.3  | 1.0 | 0.0 | 0.4 | 0.7 | 1.0 | 0.7 | 0.9 | 0.2 | 0.7 | 0.2 | 1.0 |     | 0.7 | 0.8 | 0.7 | 0.5 | 0.9 | 0.5 | 1.0 | 0.0 | 0.9 | 1.0 | 0.8 |  |  |  |  |
| Omni-Scale    | 1.0 | 0.2  | 1.0 | 0.0 | 1.0 | 0.3 | 0.5 | 1.0 |     | 0.9 | 0.4 | 0.8 | 0.4 | 1.0 | 0.3 |     | 0.9 | 0.4 | 0.1 | 1.0 | 0.0 | 1.0 | 0.1 | 0.6 | 1.0 |  |  |  |  |
| PatchTST      | 0.9 | 0.3  | 1.0 | 0.0 | 0.3 | 0.4 | 1.0 | 0.1 | 0.9 | 0.3 | 0.6 | 0.0 | 1.0 | 0.2 | 0.1 |     | 0.1 | 0.0 | 0.9 | 0.0 | 1.0 | 0.0 | 0.1 | 1.0 | 0.8 |  |  |  |  |
| Pathformer    | 0.9 | 0.3  | 1.0 | 0.1 | 0.3 | 0.7 | 1.0 | 0.8 | 0.9 | 0.4 | 0.6 | 0.3 | 1.0 | 0.3 | 0.6 | 0.9 |     | 0.8 | 1.0 | 0.4 | 1.0 | 0.1 | 1.0 | 1.0 | 0.9 |  |  |  |  |
| Pyraformer    | 1.0 | 0.6  | 1.0 | 0.4 | 0.4 | 0.7 | 1.0 | 0.9 | 0.9 | 0.6 | 0.8 | 0.4 | 1.0 | 0.5 | 0.9 | 1.0 | 0.2 |     | 1.0 |     | 1.0 | 0.1 | 0.6 | 1.0 | 1.0 |  |  |  |  |
| SPaRCNet      | 0.6 | 0.0  | 0.2 | 0.0 | 0.1 | 0.3 | 0.8 | 0.0 | 0.7 | 0.1 | 0.3 | 0.0 | 0.8 | 0.1 | 0.0 | 0.0 | 0.0 | 0.0 |     | 0.0 | 0.9 | 0.0 | 0.1 | 0.2 | 0.0 |  |  |  |  |
| Seizureformer | 1.0 | 0.7  | 1.0 | 0.2 | 0.4 | 0.5 | 1.0 | 1.0 | 0.9 | 0.6 | 0.9 | 0.5 | 1.0 | 0.5 | 1.0 | 1.0 | 0.6 |     | 1.0 |     | 1.0 | 0.1 | 0.8 | 1.0 | 1.0 |  |  |  |  |
| SimpleTM      | 0.1 | 0.0  | 0.0 | 0.0 | 0.0 | 0.1 | 0.1 | 0.0 | 0.6 | 0.0 | 0.0 | 0.0 | 0.1 | 0.0 | 0.0 | 0.0 | 0.0 | 0.0 | 0.1 | 1.0 |     | 0.0 | 0.0 | 0.2 | 0.0 |  |  |  |  |
| TSLANet       | 1.0 | 0.8  | 1.0 | 0.9 | 0.6 | 0.7 | 1.0 | 0.9 | 0.9 | 0.5 | 0.8 | 0.3 | 1.0 | 1.0 | 0.9 | 1.0 | 0.9 | 0.9 | 1.0 | 0.9 | 1.0 |     | 0.9 | 1.0 | 1.0 |  |  |  |  |
| TimeMixer     | 0.9 | 0.2  | 0.9 | 0.0 | 0.4 | 0.6 | 1.0 | 0.5 | 0.9 | 0.3 | 0.4 | 0.3 | 1.0 | 0.1 | 0.4 | 0.9 | 0.0 | 0.4 | 0.9 | 0.2 | 1.0 | 0.0 |     | 1.0 | 0.7 |  |  |  |  |
| TimesNet      | 0.4 | 0.0  | 0.0 | 0.0 | 0.2 | 0.4 | 0.9 | 0.0 | 0.6 | 0.0 | 0.2 | 0.0 | 0.9 | 0.0 | 0.0 | 0.0 | 0.0 | 0.0 | 0.7 | 0.0 | 0.8 | 0.0 | 0.0 |     | 0.1 |  |  |  |  |
| iTransformer  | 0.9 | 0.1  | 0.7 | 0.1 | 0.2 | 0.4 | 1.0 | 0.0 | 0.9 | 0.2 | 0.6 | 0.0 | 1.0 | 0.2 | 0.0 | 0.2 | 0.1 | 0.0 | 1.0 | 0.0 | 1.0 | 0.0 | 0.3 | 0.9 |     |  |  |  |  |

|     |     | SEN ↑ |     |     |     |     |     |     |     |     |     |     |     |     |     |     |     |     |     |     |     |     |     |     |     |  |
|-----|-----|-------|-----|-----|-----|-----|-----|-----|-----|-----|-----|-----|-----|-----|-----|-----|-----|-----|-----|-----|-----|-----|-----|-----|-----|--|
|     |     | 0.0   | 0.0 | 0.0 | 0.0 | 0.0 | 0.1 | 0.0 | 0.1 | 0.0 | 0.0 | 0.0 | 0.1 | 0.0 | 0.0 | 0.0 | 0.0 | 0.1 | 0.0 |     | 0.0 | 0.0 | 0.0 | 0.0 | 0.0 |  |
| 1.0 |     | 0.7   | 0.0 | 0.2 | 0.4 | 1.0 | 0.4 | 0.6 |     | 1.0 | 0.0 | 1.0 | 0.2 | 0.4 | 0.4 | 0.3 | 0.2 |     | 0.5 | 1.0 |     | 0.2 | 0.8 | 0.6 |     |  |
| 1.0 | 0.3 |       | 0.0 | 0.1 | 0.4 | 1.0 | 0.0 | 0.4 | 0.1 | 1.0 | 0.0 | 1.0 | 0.0 | 0.0 |     | 0.0 | 0.0 | 1.0 | 0.0 | 1.0 | 0.0 | 0.0 |     | 0.1 |     |  |
| 1.0 | 0.9 | 1.0   |     | 0.4 | 0.5 | 1.0 | 1.0 | 0.6 | 0.9 | 1.0 | 0.6 | 1.0 |     | 1.0 | 1.0 |     | 1.0 | 1.0 | 1.0 | 1.0 |     | 1.0 | 1.0 | 1.0 |     |  |
| 1.0 | 0.8 | 0.8   | 0.6 |     | 1.0 | 0.9 | 0.6 | 1.0 | 0.8 | 1.0 | 0.6 | 0.9 | 0.6 | 0.6 | 0.7 | 0.6 | 0.6 | 0.9 | 0.6 | 1.0 | 0.6 | 0.6 | 0.9 | 0.8 |     |  |
| 1.0 | 0.6 | 0.6   | 0.5 | 0.0 |     | 0.8 | 0.6 | 1.0 | 0.6 | 0.9 | 0.6 | 0.8 | 0.6 | 0.6 | 0.6 | 0.6 | 0.6 | 0.6 | 0.6 | 1.0 | 0.5 | 0.6 | 0.6 | 0.6 |     |  |
| 0.9 | 0.0 | 0.0   | 0.0 | 0.1 | 0.2 |     | 0.0 | 0.4 | 0.0 | 0.6 | 0.0 |     | 0.0 | 0.0 | 0.0 | 0.0 | 0.0 | 0.6 | 0.0 | 1.0 | 0.0 | 0.0 | 0.1 | 1.0 |     |  |
| 1.0 | 0.5 | 1.0   | 0.0 | 0.4 | 0.4 | 1.0 |     | 0.5 | 0.5 | 1.0 | 0.2 | 1.0 | 0.0 |     | 0.6 | 0.3 | 0.0 | 1.0 |     | 1.0 | 0.0 | 0.0 | 1.0 |     |     |  |
| 0.9 | 0.4 | 0.6   | 0.4 | 0.0 | 0.0 | 0.6 | 0.5 |     | 0.3 | 0.6 | 0.2 | 0.6 | 0.5 | 0.5 | 0.4 | 0.5 | 0.5 | 0.6 | 0.5 | 0.9 | 0.4 | 0.4 | 0.6 | 0.6 |     |  |
| 1.0 |     | 0.9   | 0.1 | 0.2 | 0.4 | 1.0 | 0.5 | 0.7 |     | 1.0 | 0.0 | 1.0 | 0.3 | 0.5 | 0.6 | 0.4 | 0.3 | 1.0 | 0.6 | 1.0 | 0.0 | 0.3 | 0.9 | 0.8 |     |  |
| 1.0 | 0.0 | 0.0   | 0.0 | 0.0 | 0.1 | 0.4 | 0.0 | 0.4 | 0.0 |     | 0.0 | 0.4 | 0.0 | 0.0 | 0.0 | 0.0 | 0.0 | 0.2 | 0.0 | 1.0 | 0.0 | 0.0 | 0.2 | 0.0 |     |  |
| 1.0 | 1.0 | 1.0   | 0.3 | 0.4 | 0.4 | 1.0 | 0.8 | 0.8 | 1.0 | 1.0 |     | 1.0 | 0.5 | 0.8 | 0.8 | 0.6 | 0.5 | 1.0 | 0.7 | 1.0 | 0.3 | 0.6 | 1.0 | 1.0 |     |  |
| 0.9 | 0.0 | 0.0   | 0.0 | 0.1 | 0.2 |     | 0.0 | 0.4 | 0.0 | 0.6 | 0.0 |     | 0.0 | 0.0 | 0.0 | 0.0 | 0.0 | 0.6 | 0.0 | 1.0 | 0.0 | 0.0 | 0.1 | 1.0 |     |  |
| 1.0 | 0.8 | 1.0   |     | 0.4 | 0.4 | 1.0 | 1.0 | 0.5 | 0.7 | 1.0 | 0.4 | 1.0 |     | 1.0 | 0.9 |     |     | 1.0 | 1.0 | 1.0 | 0.0 |     | 1.0 | 1.0 |     |  |
| 1.0 | 0.6 | 1.0   | 0.0 | 0.4 | 0.4 | 1.0 |     | 0.5 | 0.5 | 1.0 | 0.2 | 1.0 | 0.0 |     |     | 0.2 | 0.0 | 1.0 |     | 1.0 | 0.0 | 0.0 | 1.0 |     |     |  |
| 1.0 | 0.6 |       | 0.0 | 0.3 | 0.4 | 1.0 | 0.4 | 0.6 | 0.4 | 1.0 | 0.1 | 1.0 | 0.0 |     |     | 0.2 | 0.0 | 1.0 |     | 1.0 | 0.0 | 0.0 | 1.0 |     |     |  |
| 1.0 | 0.7 | 1.0   |     | 0.4 | 0.4 | 1.0 | 0.7 | 0.5 | 0.6 | 1.0 | 0.4 | 1.0 |     | 0.8 | 0.8 |     |     | 1.0 | 0.8 | 1.0 | 0.0 |     | 1.0 | 0.9 |     |  |
| 1.0 | 0.8 | 1.0   | 0.0 | 0.4 | 0.4 | 1.0 | 1.0 | 0.5 | 0.7 | 1.0 | 0.4 | 1.0 |     | 1.0 | 0.9 |     |     | 1.0 | 1.0 | 1.0 | 0.0 |     | 1.0 | 1.0 |     |  |
| 0.9 |     | 0.0   | 0.0 | 0.1 | 0.4 | 0.4 | 0.0 | 0.4 | 0.0 | 0.8 | 0.0 | 0.4 | 0.0 | 0.0 | 0.0 | 0.0 | 0.0 |     | 0.0 | 0.9 | 0.0 | 0.0 | 0.0 | 0.0 |     |  |
| 1.0 | 0.5 | 1.0   | 0.0 | 0.4 | 0.4 | 1.0 |     | 0.5 | 0.4 | 1.0 | 0.3 | 1.0 | 0.0 |     |     | 0.2 | 0.0 | 1.0 |     | 1.0 | 0.0 | 0.0 | 1.0 |     |     |  |
|     |     | 0.0   | 0.0 | 0.0 | 0.0 | 0.0 | 0.0 | 0.1 | 1.0 | 0.0 | 0.0 | 0.0 | 0.0 | 0.0 | 0.0 | 0.0 | 0.0 | 0.0 | 0.1 | 0.0 |     | 0.0 | 0.0 | 0.0 | 0.0 |  |
| 1.0 |     | 1.0   |     | 0.4 | 0.5 | 1.0 | 1.0 | 0.6 | 1.0 | 1.0 | 0.7 | 1.0 | 1.0 | 1.0 | 1.0 | 1.0 | 1.0 | 1.0 | 1.0 |     | 1.0 | 1.0 | 1.0 |     |     |  |
| 1.0 | 0.8 | 1.0   | 0.0 | 0.4 | 0.4 | 1.0 | 1.0 | 0.6 | 0.7 | 1.0 | 0.4 | 1.0 |     | 1.0 | 1.0 |     |     | 1.0 | 1.0 | 1.0 | 0.0 |     | 1.0 | 1.0 |     |  |
| 1.0 | 0.2 |       | 0.0 | 0.1 | 0.4 | 0.9 | 0.0 | 0.4 | 0.1 | 0.8 | 0.0 | 0.9 | 0.0 | 0.0 | 0.0 | 0.0 | 0.0 | 1.0 | 0.0 | 1.0 | 0.0 | 0.0 |     | 0.1 |     |  |
| 1.0 | 0.4 | 0.9   | 0.0 | 0.2 | 0.4 | 1.0 |     | 0.4 | 0.2 | 1.0 | 0.0 | 1.0 | 0.0 |     |     | 0.1 | 0.0 | 1.0 |     | 1.0 | 0.0 | 0.0 | 0.9 |     |     |  |

|     |     | F1 ↑ |     |     |     |     |     |     |     |     |     |     |     |     |     |     |     |     |     |     |     |     |     |     |     |     |     |     |     |
|-----|-----|------|-----|-----|-----|-----|-----|-----|-----|-----|-----|-----|-----|-----|-----|-----|-----|-----|-----|-----|-----|-----|-----|-----|-----|-----|-----|-----|-----|
|     |     | 0.0  | 0.0 | 0.0 | 0.0 | 0.0 | 0.1 | 0.0 | 0.3 | 0.0 | 0.0 | 0.0 | 0.1 | 0.0 | 0.0 | 0.0 | 0.0 | 0.1 | 0.0 | 0.9 | 0.0 | 0.0 | 0.0 | 0.0 | 0.0 | 0.0 | 0.0 | 0.0 | 0.0 |
| 1.0 |     | 0.8  | 0.0 | 0.3 | 0.4 |     | 0.4 | 0.6 |     | 1.0 | 0.0 |     | 0.3 | 0.5 | 0.4 | 0.3 | 0.3 | 0.9 | 0.4 | 1.0 | 0.0 | 0.5 | 0.9 | 0.7 |     |     |     |     |     |
| 1.0 | 0.1 |      | 0.0 | 0.4 | 0.4 | 1.0 | 0.0 | 0.6 | 0.1 | 1.0 | 0.0 | 1.0 | 0.0 | 0.0 | 0.0 | 0.0 | 0.0 | 1.0 | 0.0 | 1.0 | 0.0 | 0.0 | 1.0 | 0.1 |     |     |     |     |     |
| 1.0 | 0.9 | 1.0  |     | 0.5 | 0.6 | 1.0 | 1.0 | 0.6 | 0.8 | 1.0 | 0.5 | 1.0 |     | 1.0 | 1.0 |     |     | 1.0 | 1.0 | 1.0 |     |     | 1.0 | 1.0 |     |     |     |     |     |
| 1.0 | 0.7 | 0.6  | 0.5 |     | 1.0 | 0.9 | 0.6 | 1.0 | 0.7 | 1.0 | 0.6 | 0.9 | 0.6 | 0.6 | 0.6 | 0.6 | 0.6 | 0.9 | 0.6 | 1.0 | 0.5 | 0.6 |     | 0.7 |     |     |     |     |     |
| 1.0 | 0.6 | 0.6  | 0.4 | 0.0 |     | 0.6 | 0.5 | 1.0 | 0.6 | 0.8 | 0.4 | 0.6 | 0.5 | 0.5 | 0.6 | 0.5 | 0.5 | 0.6 | 0.5 | 1.0 | 0.4 | 0.5 | 0.6 | 0.6 |     |     |     |     |     |
| 0.9 |     | 0.0  | 0.0 | 0.1 | 0.4 |     | 0.0 | 0.5 | 0.0 | 0.5 | 0.0 |     | 0.0 | 0.0 | 0.0 | 0.0 | 0.0 |     | 0.0 | 1.0 | 0.0 | 0.0 |     | 0.0 |     |     |     |     |     |
| 1.0 | 0.5 | 1.0  | 0.0 | 0.4 | 0.5 | 1.0 |     | 0.6 | 0.4 | 1.0 | 0.1 | 1.0 | 0.0 |     |     | 0.4 | 0.0 | 1.0 |     | 1.0 | 0.0 | 0.2 | 1.0 |     |     |     |     |     |     |
| 0.7 | 0.4 | 0.4  | 0.4 | 0.0 | 0.0 | 0.5 | 0.4 |     | 0.3 | 0.4 | 0.2 | 0.5 | 0.4 | 0.4 | 0.4 | 0.4 | 0.4 | 0.5 | 0.4 | 0.7 | 0.4 | 0.4 | 0.5 | 0.4 |     |     |     |     |     |
| 1.0 |     | 0.9  | 0.2 | 0.3 | 0.4 | 1.0 | 0.6 | 0.7 |     | 1.0 | 0.0 | 1.0 | 0.4 | 0.6 | 0.6 | 0.4 | 0.3 | 1.0 | 0.6 | 1.0 |     | 0.6 | 0.9 | 0.8 |     |     |     |     |     |
| 1.0 | 0.0 | 0.0  | 0.0 | 0.0 | 0.2 | 0.5 | 0.0 | 0.6 | 0.0 |     | 0.0 | 0.5 | 0.0 | 0.0 | 0.0 | 0.0 | 0.0 | 0.3 | 0.0 | 1.0 | 0.0 | 0.0 | 0.1 | 0.0 |     |     |     |     |     |
| 1.0 | 1.0 | 1.0  | 0.5 | 0.4 | 0.6 | 1.0 | 0.8 | 0.8 | 1.0 | 1.0 |     | 1.0 | 0.7 | 0.8 | 0.9 | 0.8 | 0.6 | 1.0 | 0.8 | 1.0 | 0.3 | 0.7 | 1.0 | 1.0 |     |     |     |     |     |
| 0.9 |     | 0.0  | 0.0 | 0.1 | 0.4 |     | 0.0 | 0.5 | 0.0 | 0.5 | 0.0 |     | 0.0 | 0.0 | 0.0 | 0.0 | 0.0 |     | 0.0 | 1.0 | 0.0 | 0.0 |     | 0.0 |     |     |     |     |     |
| 1.0 | 0.7 | 1.0  |     | 0.4 | 0.5 | 1.0 | 1.0 | 0.6 | 0.6 | 1.0 | 0.3 | 1.0 |     |     | 0.9 |     |     | 1.0 | 1.0 | 1.0 | 0.0 | 0.8 | 1.0 | 1.0 |     |     |     |     |     |
| 1.0 | 0.5 | 1.0  | 0.0 | 0.4 | 0.5 | 1.0 |     | 0.6 | 0.4 | 1.0 | 0.1 | 1.0 |     |     |     | 0.4 | 0.0 | 1.0 |     | 1.0 | 0.0 | 0.2 | 1.0 |     |     |     |     |     |     |
| 1.0 | 0.6 | 1.0  | 0.0 | 0.4 | 0.4 | 1.0 |     | 0.6 | 0.4 | 1.0 | 0.1 | 1.0 | 0.1 |     |     | 0.3 | 0.0 | 1.0 |     | 1.0 | 0.0 | 0.1 | 1.0 |     |     |     |     |     |     |
| 1.0 | 0.7 | 1.0  |     | 0.4 | 0.5 | 1.0 | 0.6 | 0.6 | 0.6 | 1.0 | 0.2 | 1.0 |     | 0.6 | 0.7 |     |     | 1.0 |     | 1.0 | 0.0 |     | 1.0 | 0.8 |     |     |     |     |     |
| 1.0 | 0.7 | 1.0  |     | 0.4 | 0.5 | 1.0 | 1.0 | 0.6 | 0.6 | 1.0 | 0.4 | 1.0 |     | 1.0 | 1.0 |     |     | 1.0 | 1.0 | 1.0 | 0.0 |     | 1.0 | 1.0 |     |     |     |     |     |
| 0.9 | 0.0 | 0.0  | 0.0 | 0.1 | 0.4 |     | 0.0 | 0.5 | 0.0 | 0.6 | 0.0 |     | 0.0 | 0.0 | 0.0 | 0.0 | 0.0 |     | 0.0 | 0.9 | 0.0 | 0.0 | 0.0 | 0.0 |     |     |     |     |     |
| 1.0 | 0.5 | 1.0  | 0.0 | 0.4 | 0.5 | 1.0 |     | 0.6 | 0.4 | 1.0 | 0.2 | 1.0 | 0.0 |     |     |     | 0.0 | 1.0 |     | 1.0 | 0.0 | 0.2 | 1.0 |     |     |     |     |     |     |
| 0.1 | 0.0 | 0.0  | 0.0 | 0.0 | 0.0 | 0.0 | 0.0 | 0.3 | 0.0 | 0.0 | 0.0 | 0.0 | 0.0 | 0.0 | 0.0 | 0.0 | 0.0 | 0.1 | 0.0 |     | 0.0 | 0.0 | 0.0 | 0.0 |     |     |     |     |     |
| 1.0 | 1.0 | 1.0  |     | 0.5 | 0.6 | 1.0 | 1.0 | 0.6 |     | 1.0 | 0.6 | 1.0 | 1.0 | 1.0 | 1.0 | 1.0 | 1.0 | 1.0 | 1.0 | 1.0 |     | 1.0 | 1.0 | 1.0 |     |     |     |     |     |
| 1.0 | 0.5 | 1.0  |     | 0.4 | 0.5 | 1.0 | 0.8 | 0.6 | 0.4 | 1.0 | 0.3 | 1.0 | 0.2 | 0.8 | 0.9 |     |     | 1.0 | 0.8 | 1.0 | 0.0 |     | 1.0 | 0.9 |     |     |     |     |     |
| 0.9 | 0.1 | 0.0  | 0.0 |     | 0.4 |     | 0.0 | 0.5 | 0.1 | 0.9 | 0.0 |     | 0.0 | 0.0 | 0.0 | 0.0 | 0.0 | 1.0 | 0.0 | 1.0 | 0.0 | 0.0 |     | 0.1 |     |     |     |     |     |
| 1.0 | 0.3 | 0.9  | 0.0 | 0.3 | 0.4 | 1.0 |     | 0.6 | 0.2 | 1.0 | 0.0 | 1.0 | 0.0 |     |     | 0.2 | 0.0 | 1.0 |     | 1.0 | 0.0 | 0.1 | 0.9 |     |     |     |     |     |     |
