# Supplementary material
Source: ML conference proceedings conference paper supplement (https://openreview.net/forum?id=A9jXG3FUMT)

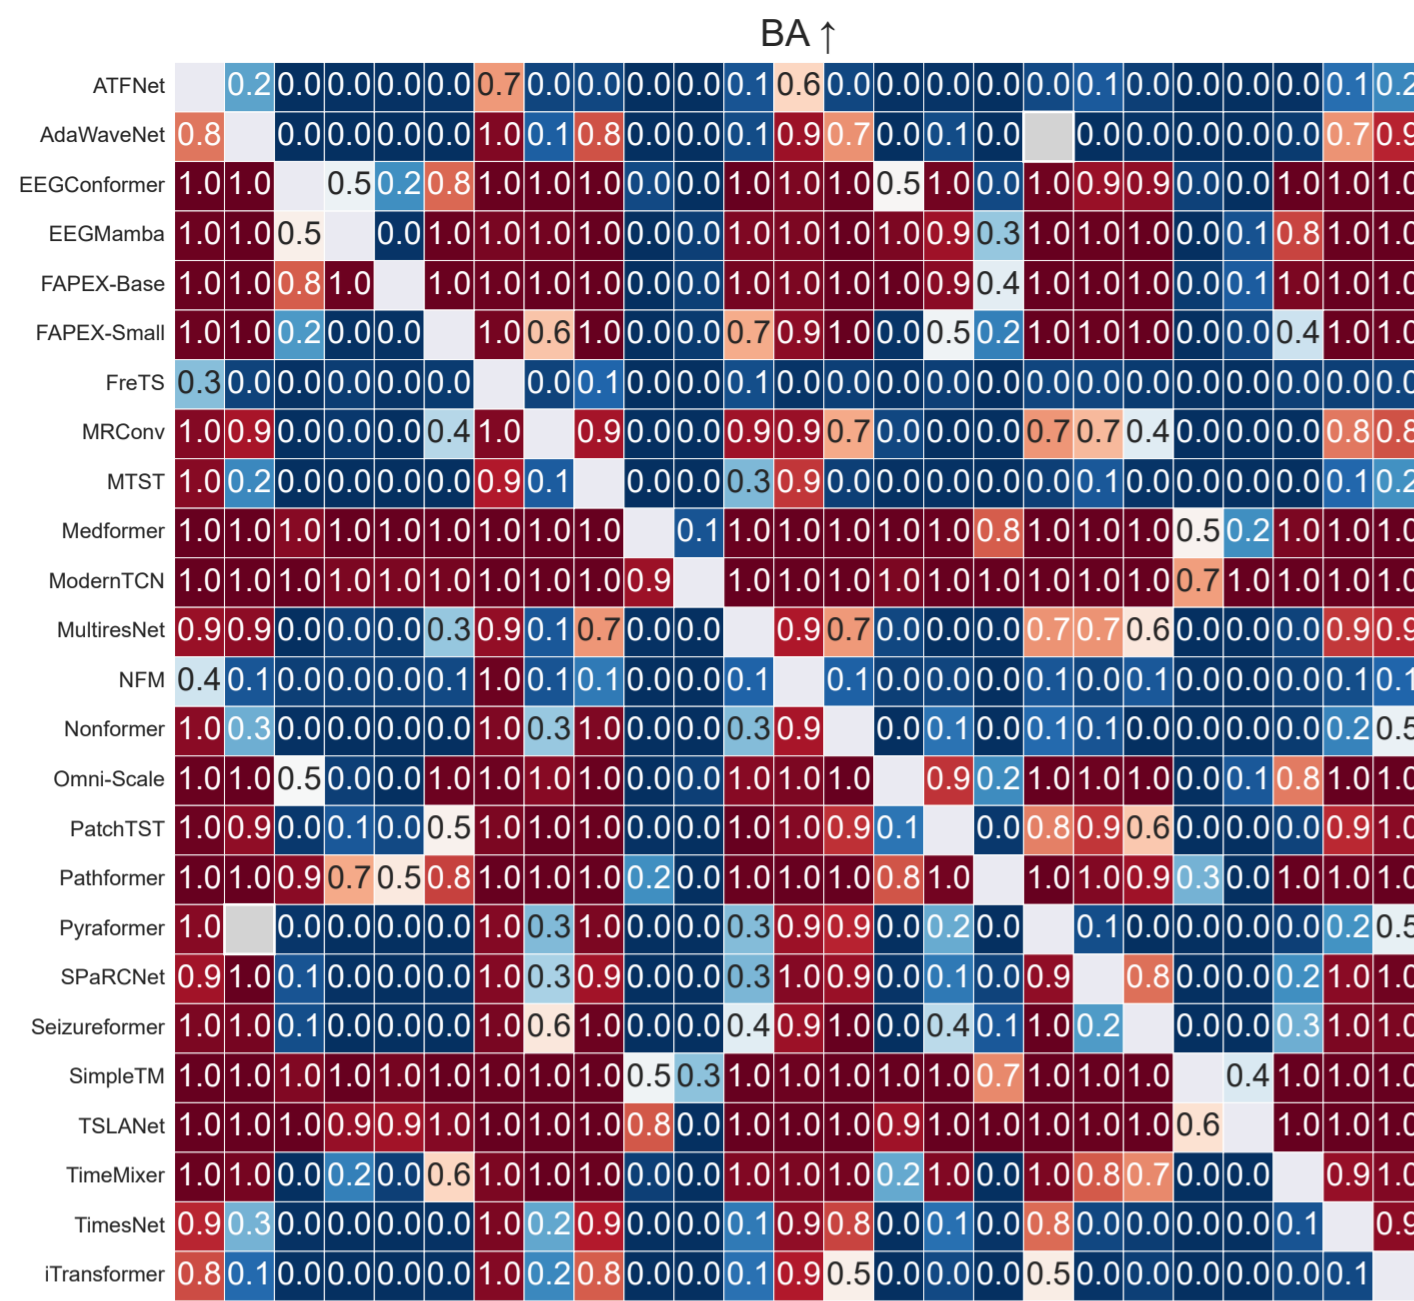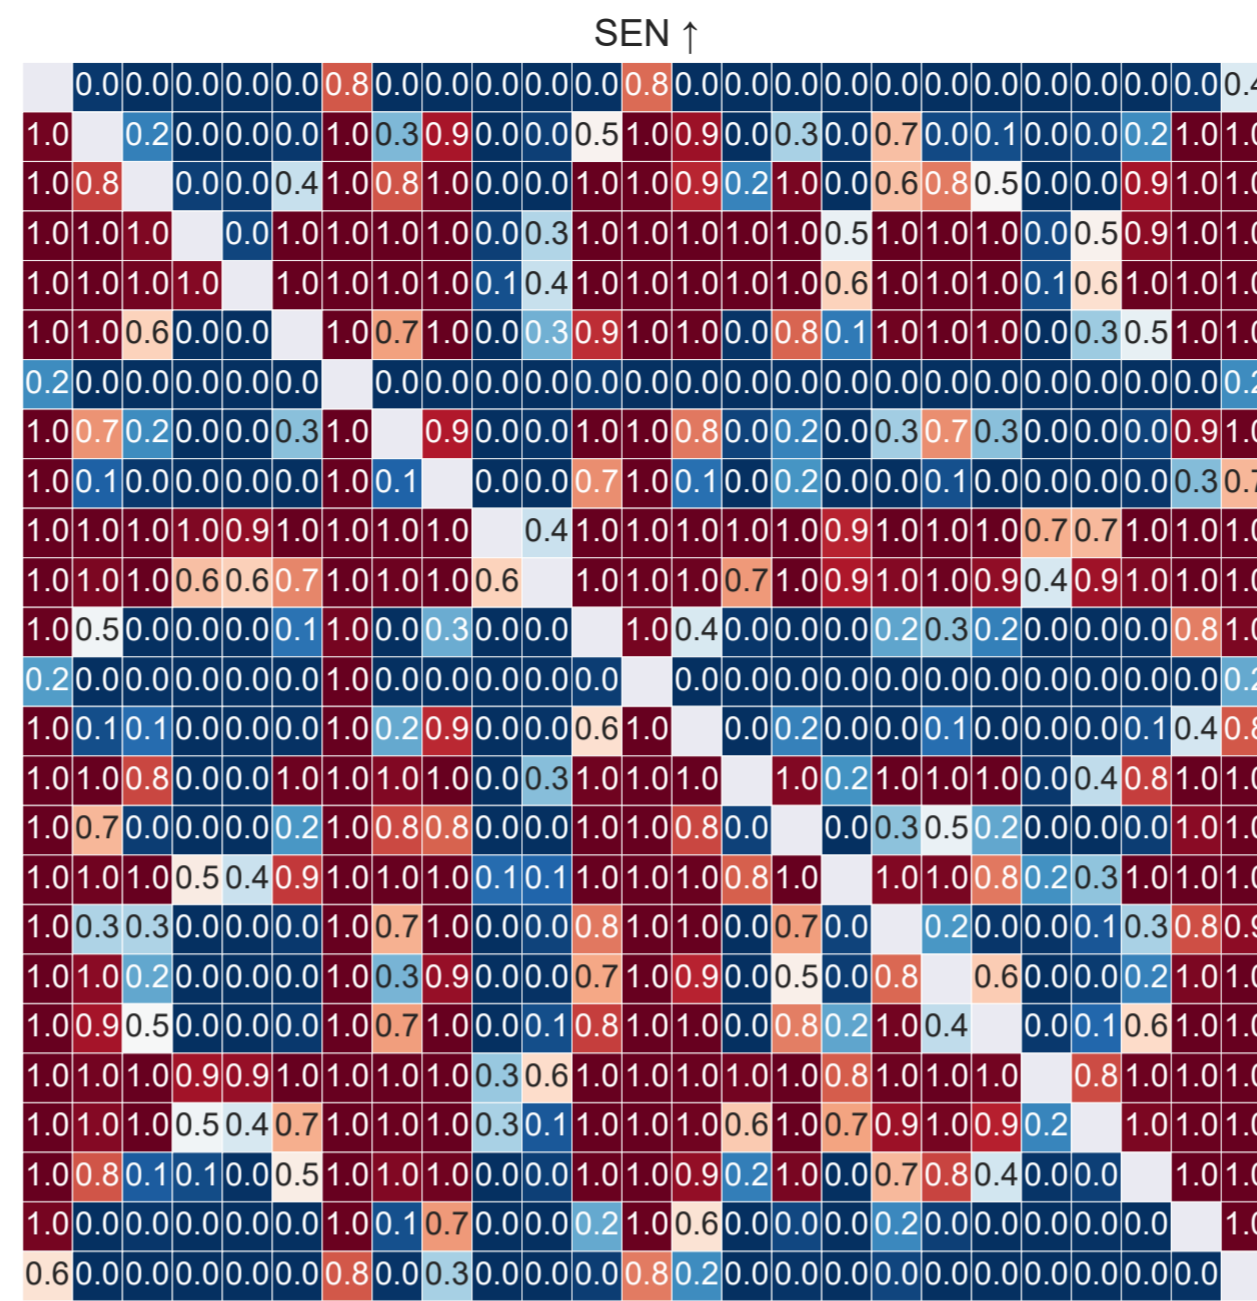

Supplement: supplementary_material [file slatlsheatmaps.pdf › supplementaries/slatlsheatmaps.pdf]

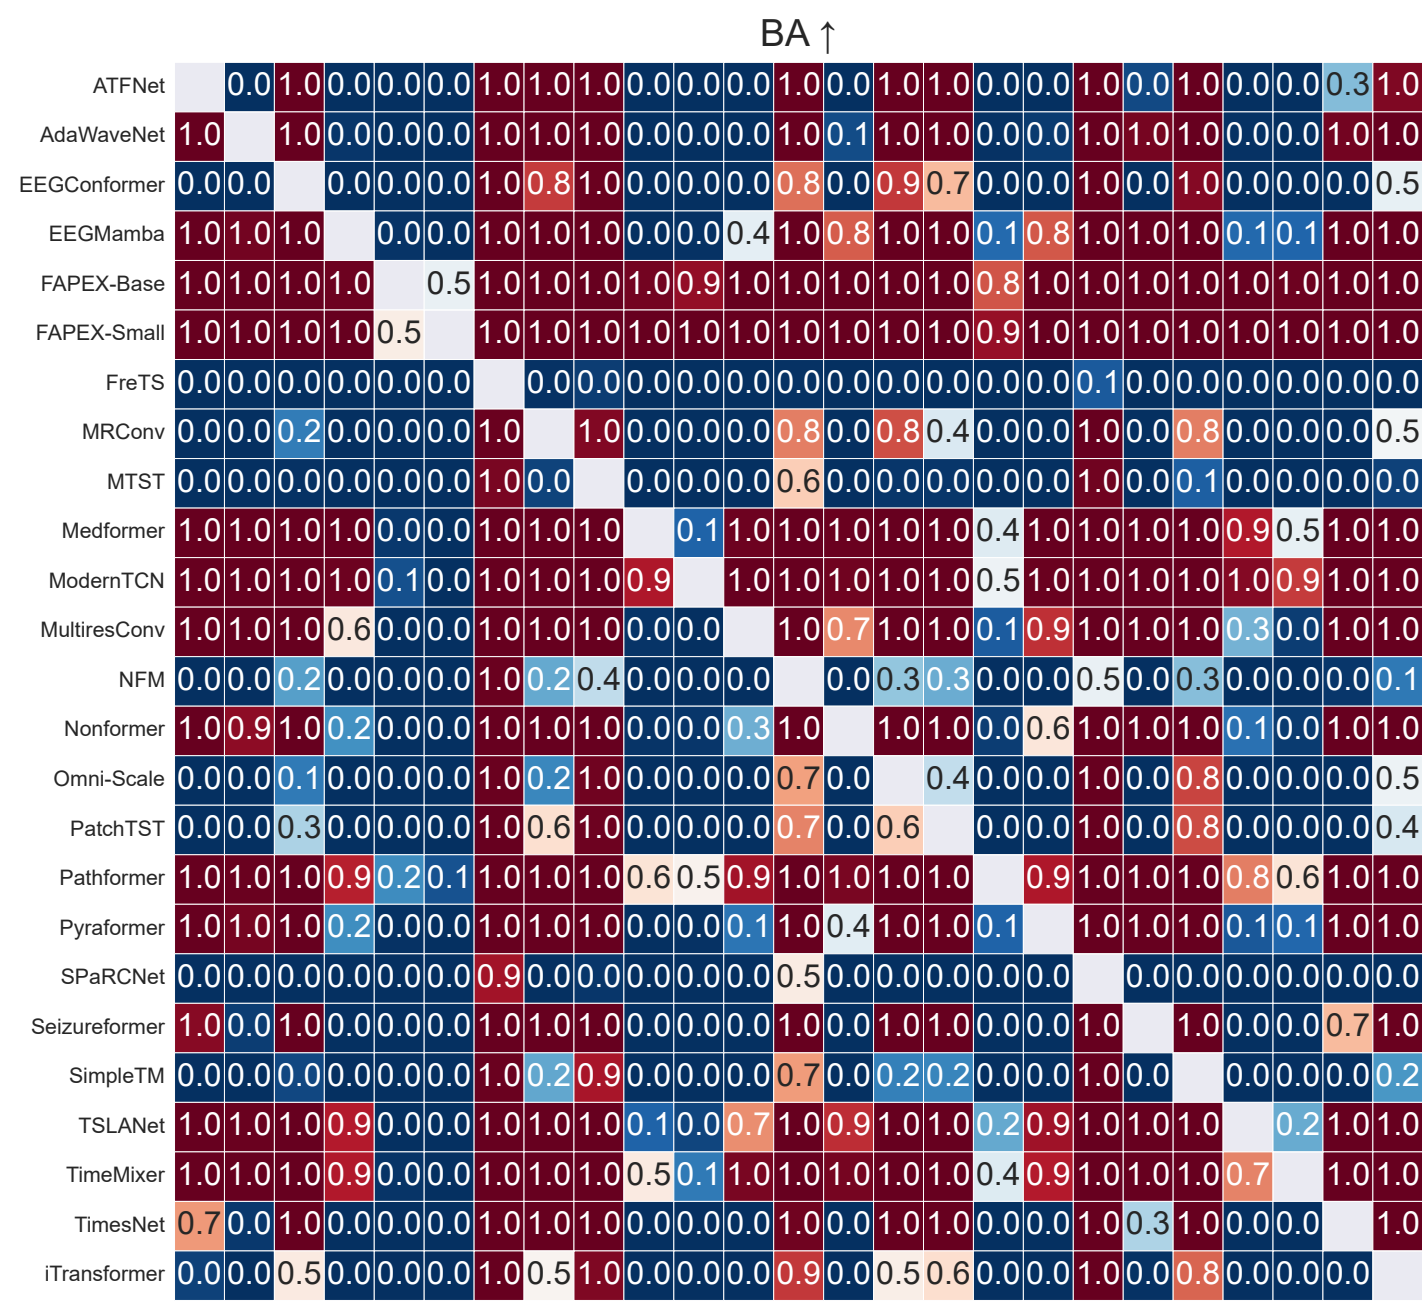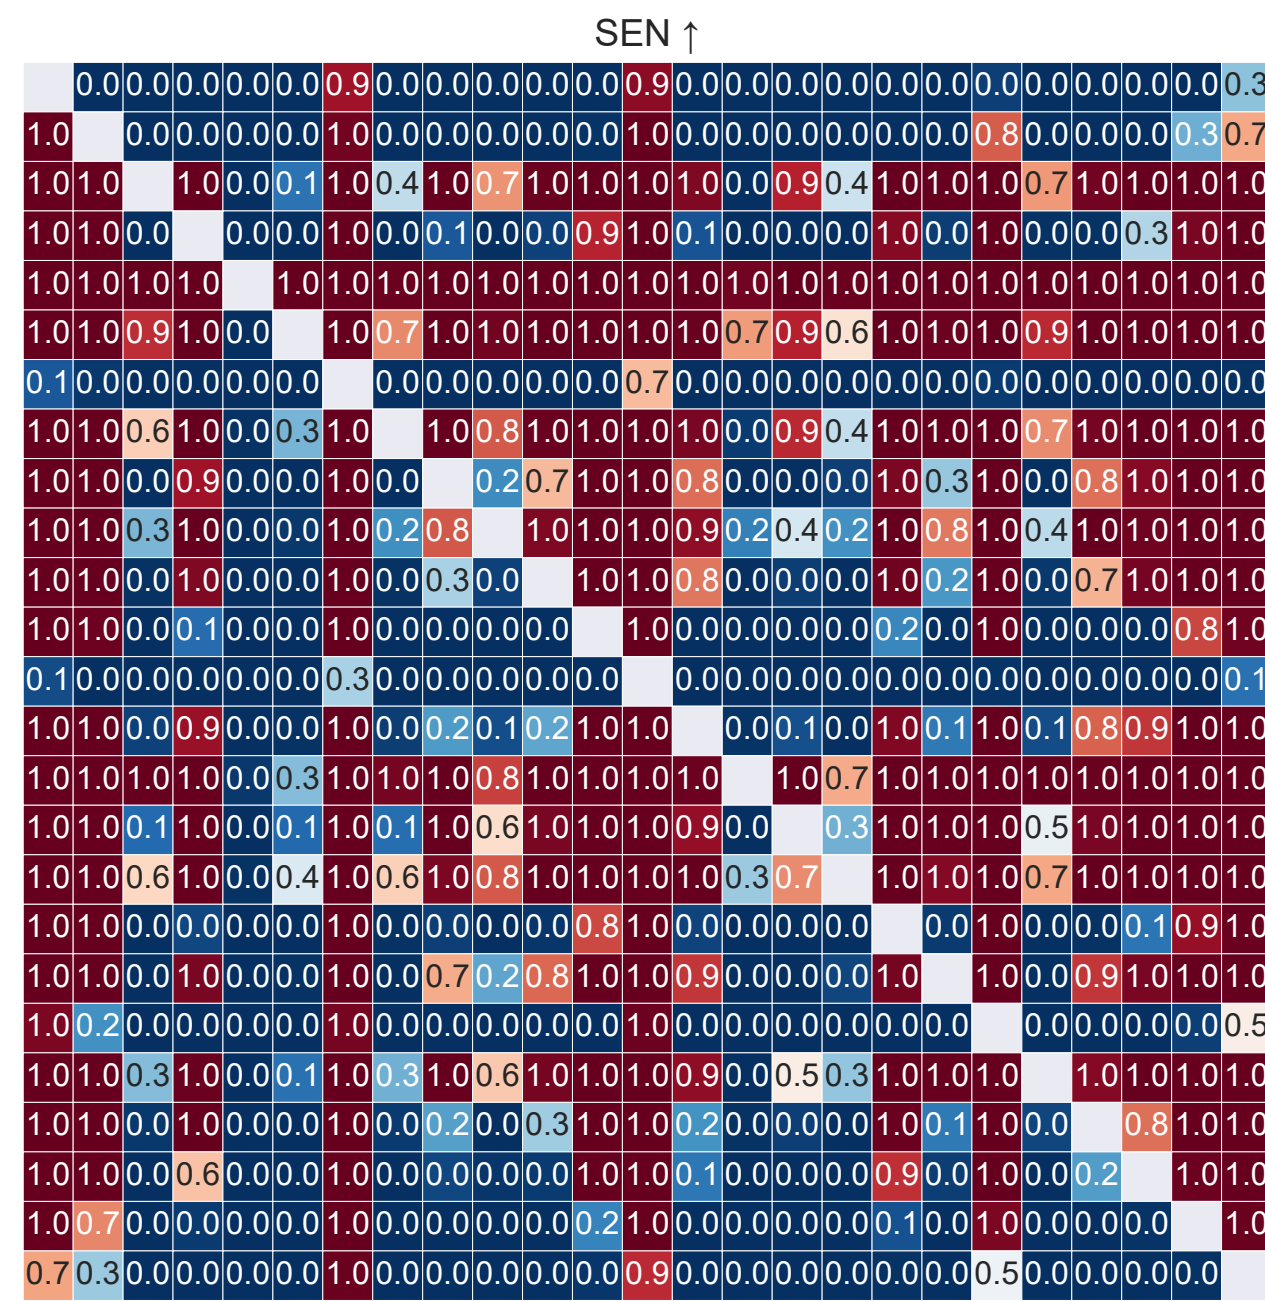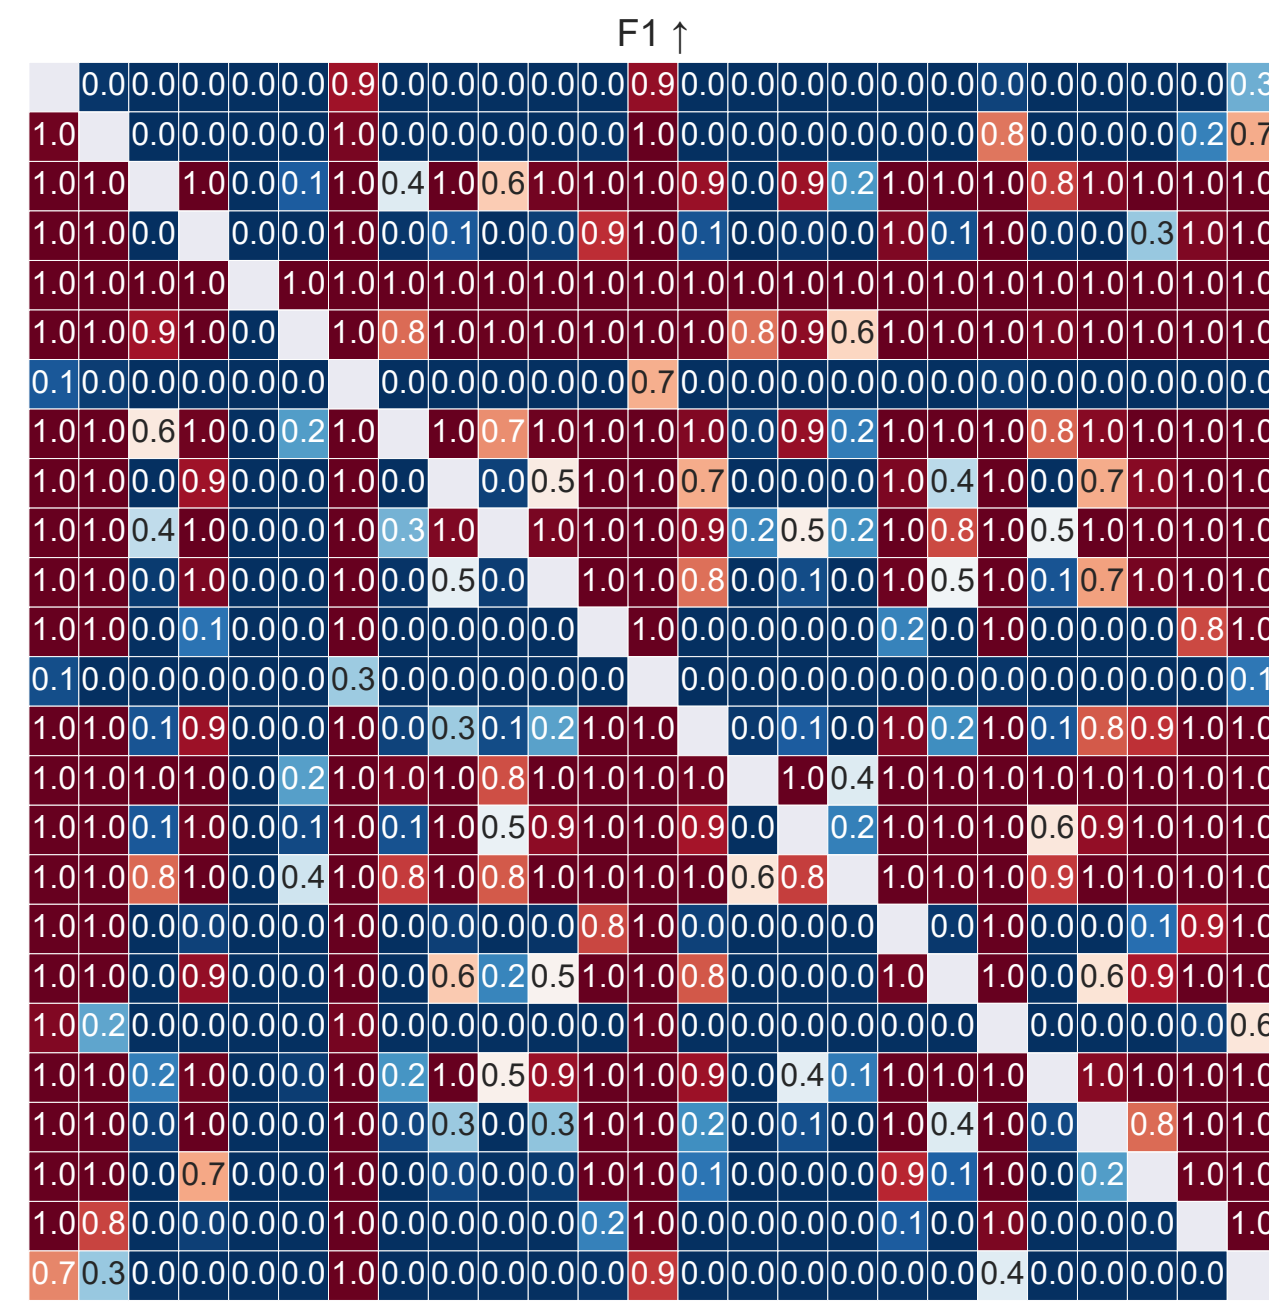

Supplement: supplementary_material [file slctleratlfpheatmaps.pdf › supplementaries/slctleratlfpheatmaps.pdf]

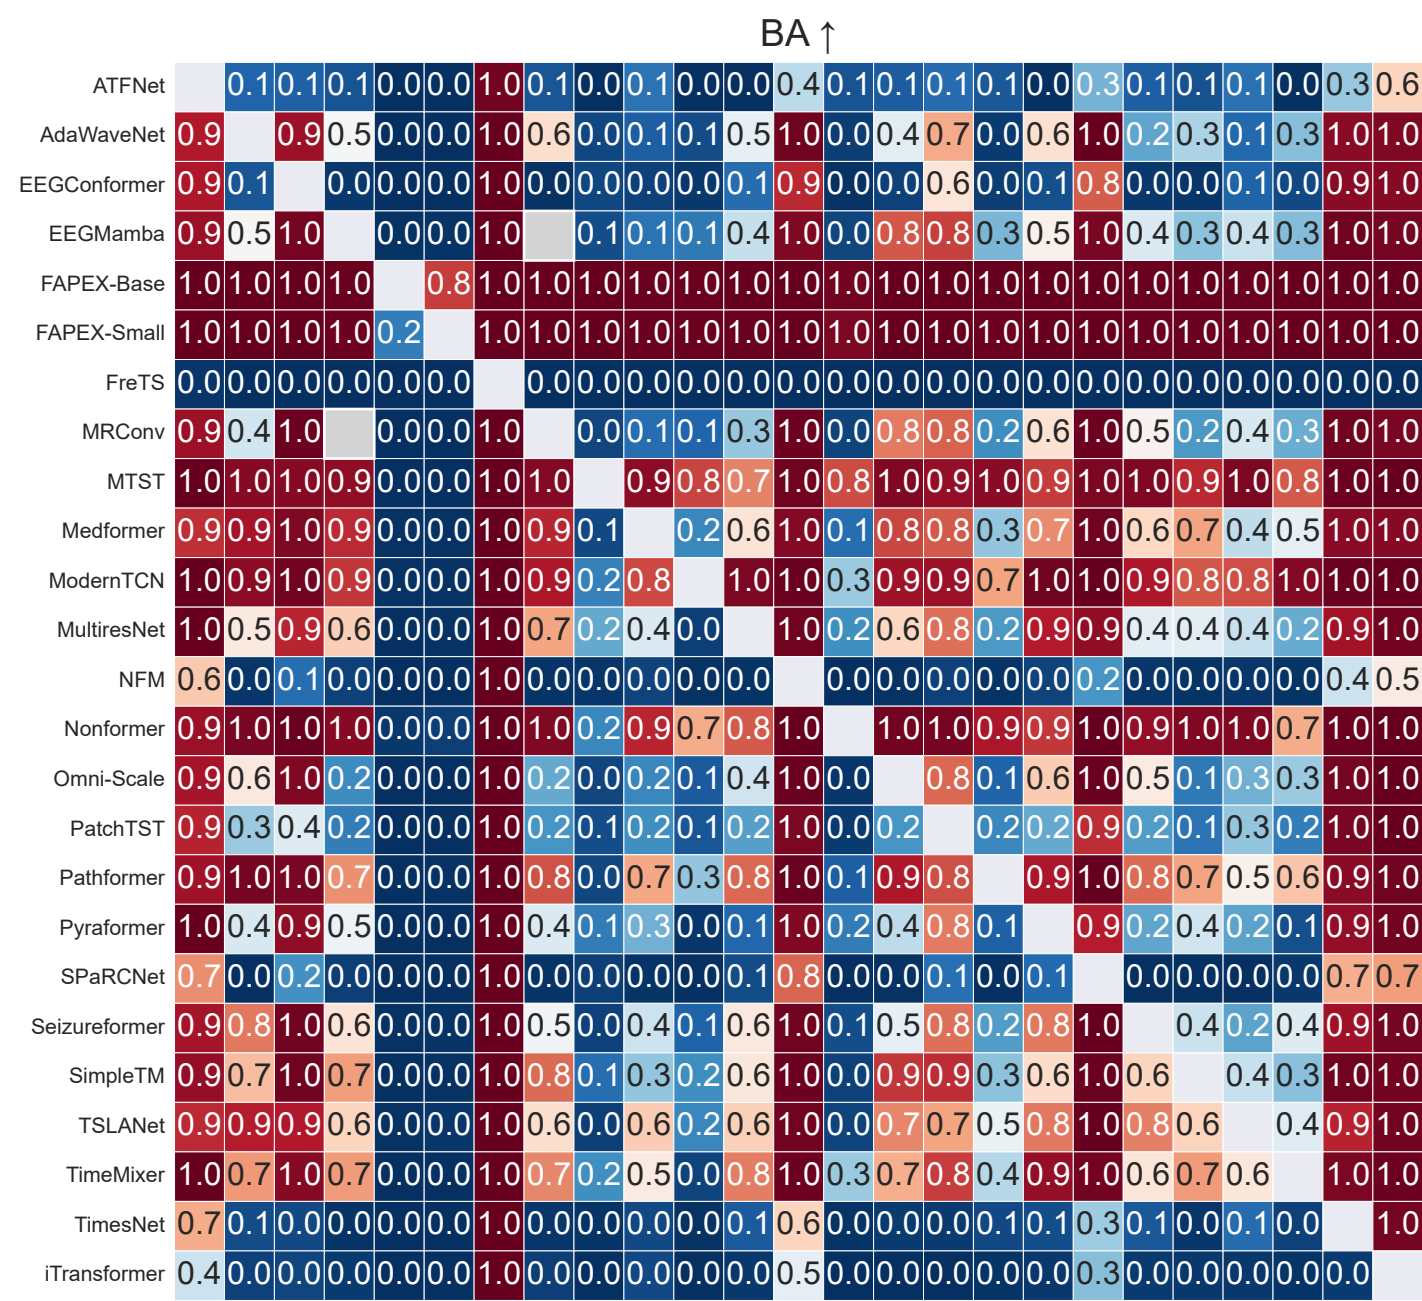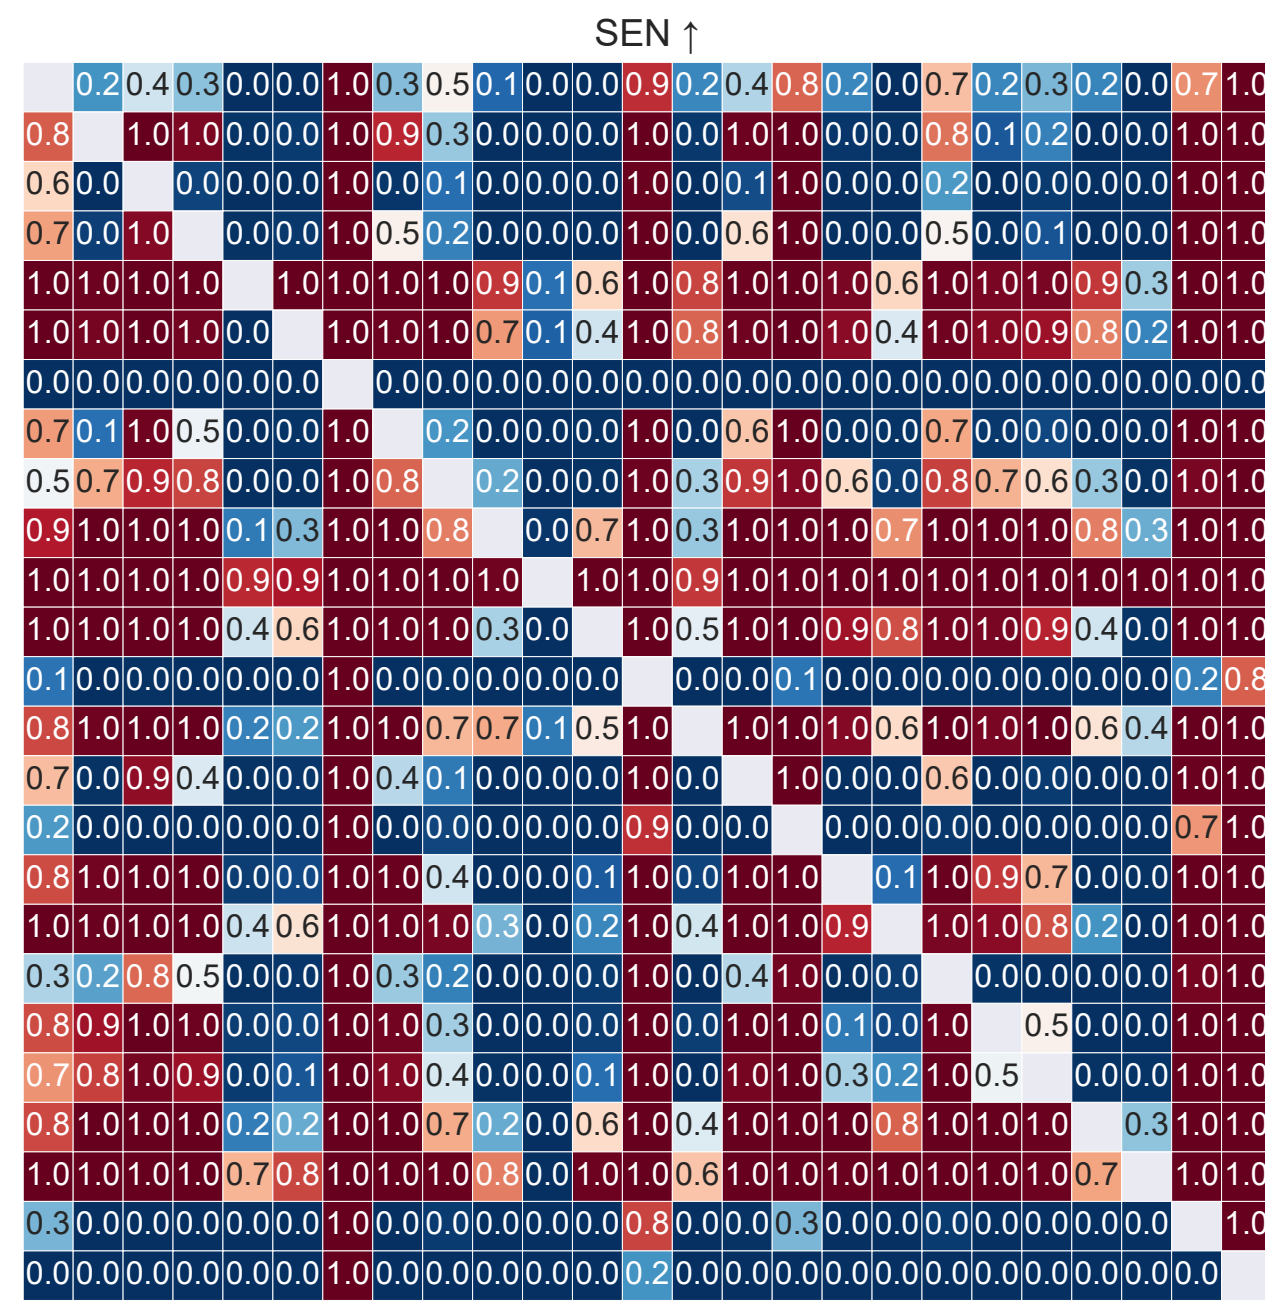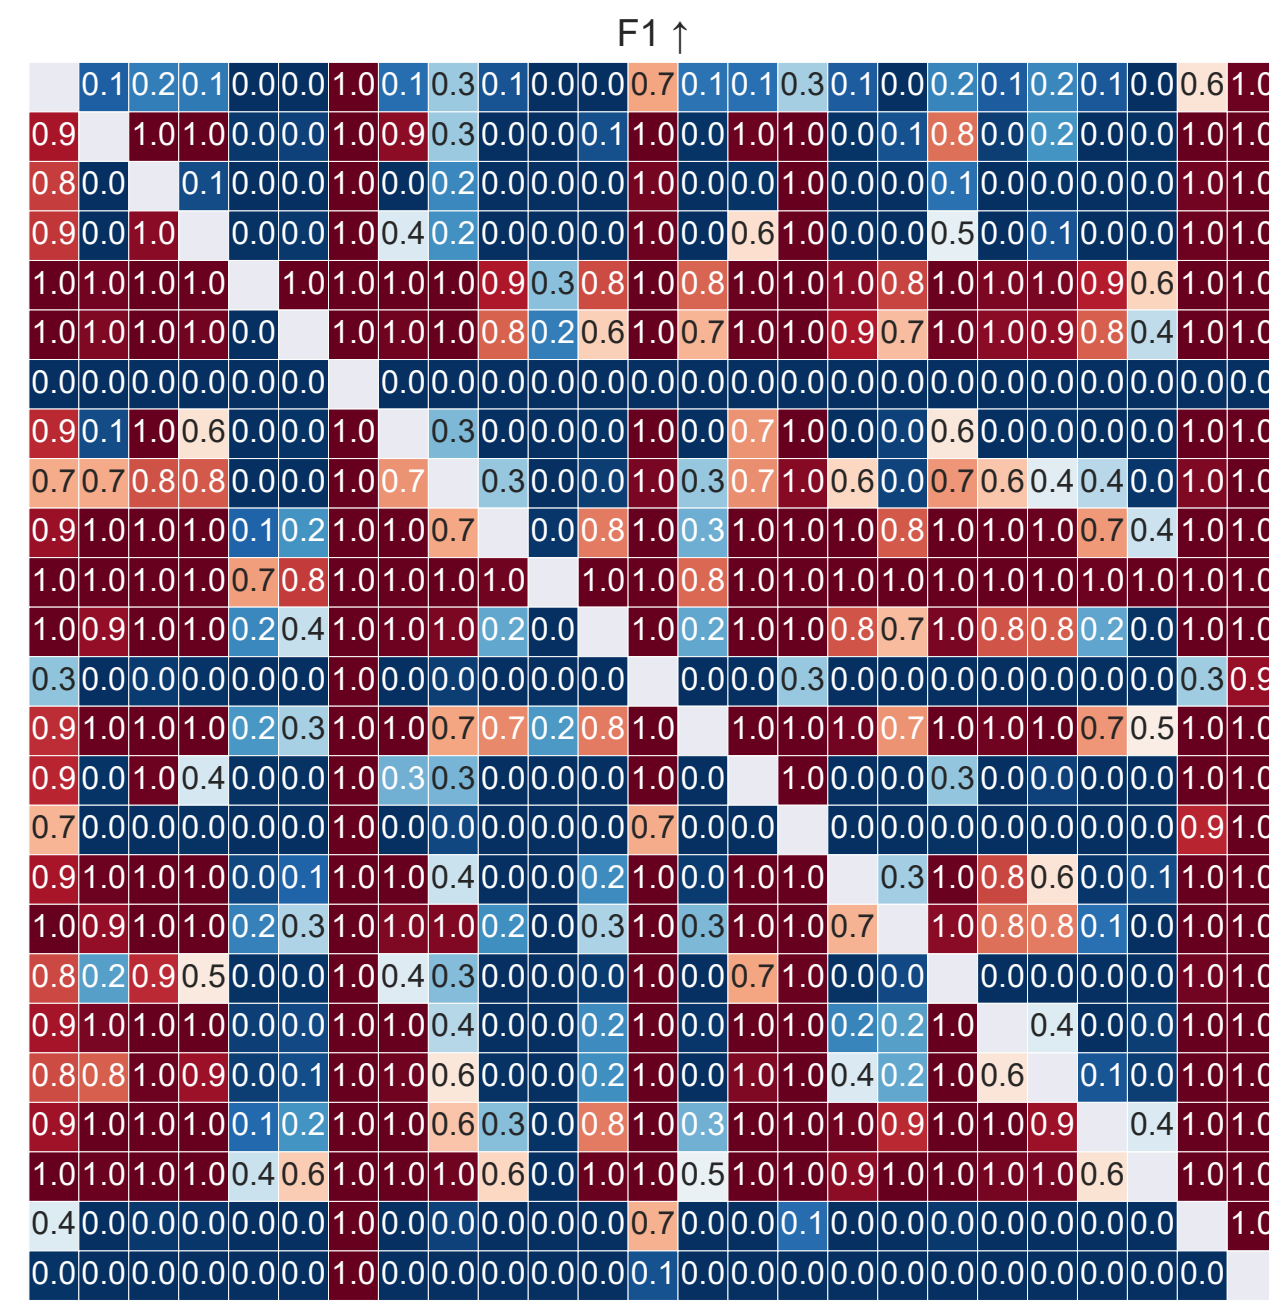

Supplement: supplementary_material [file sliessheatmaps.pdf › supplementaries/sliessheatmaps.pdf]

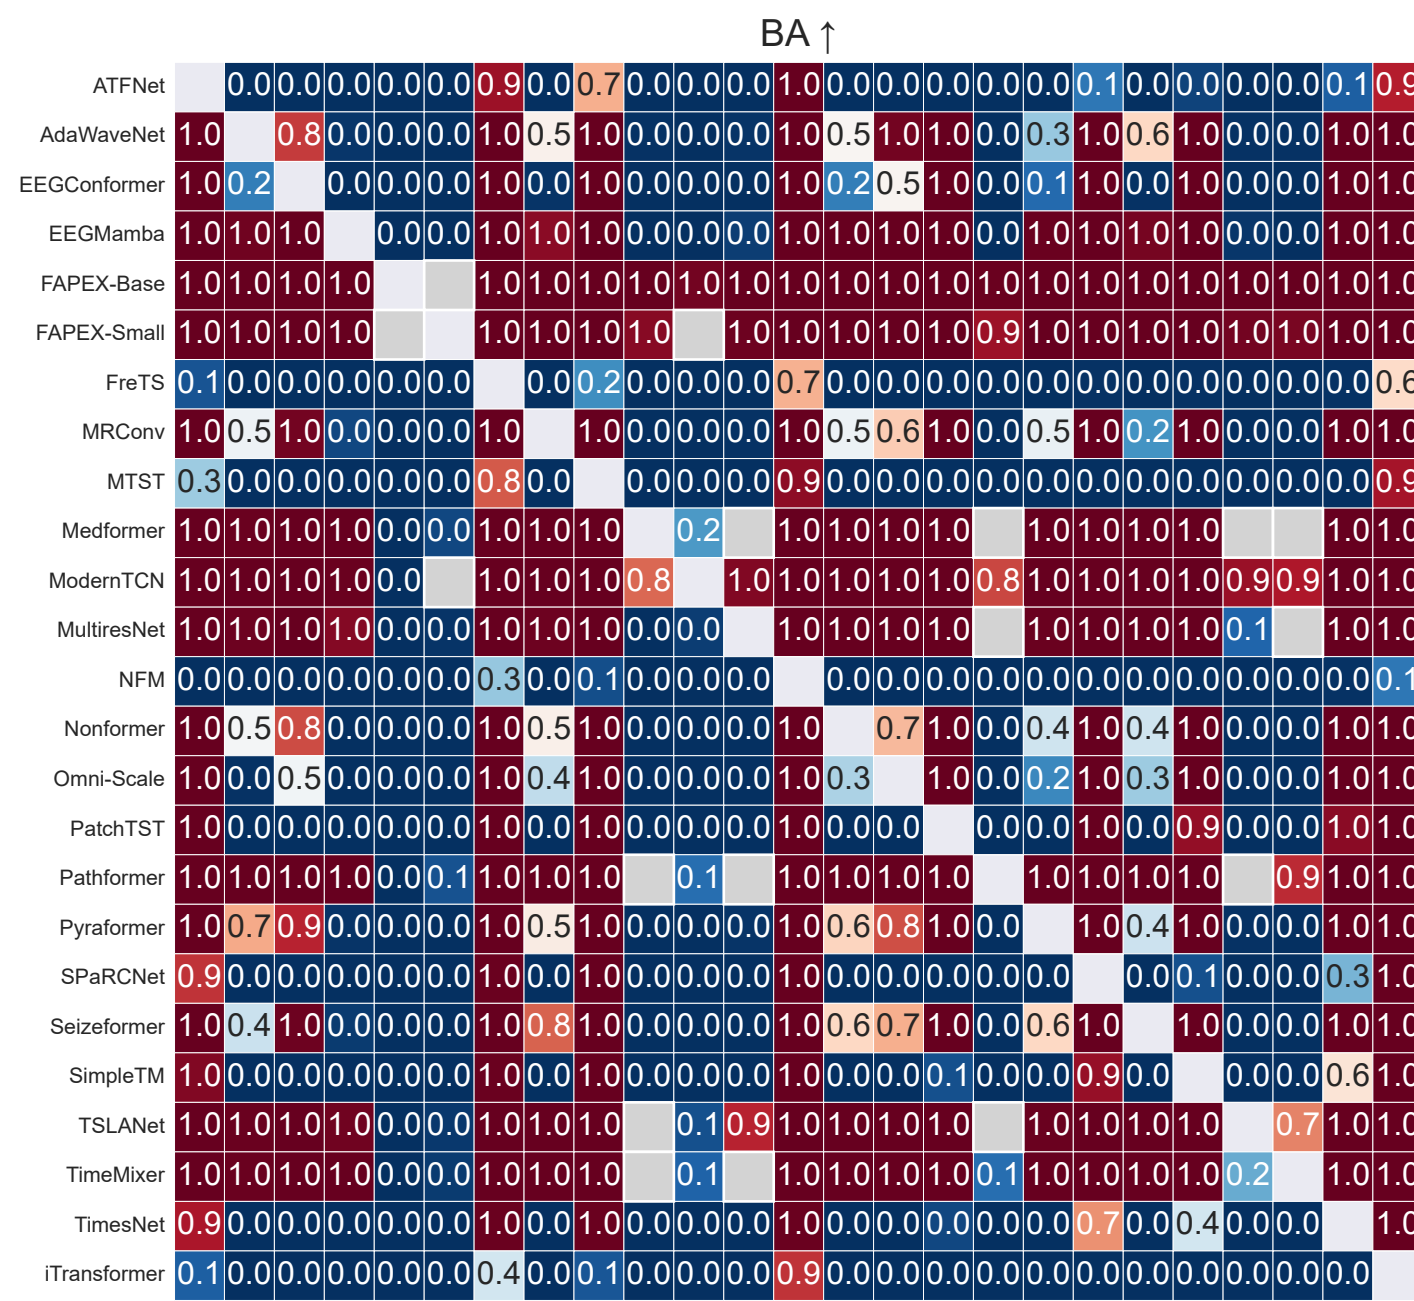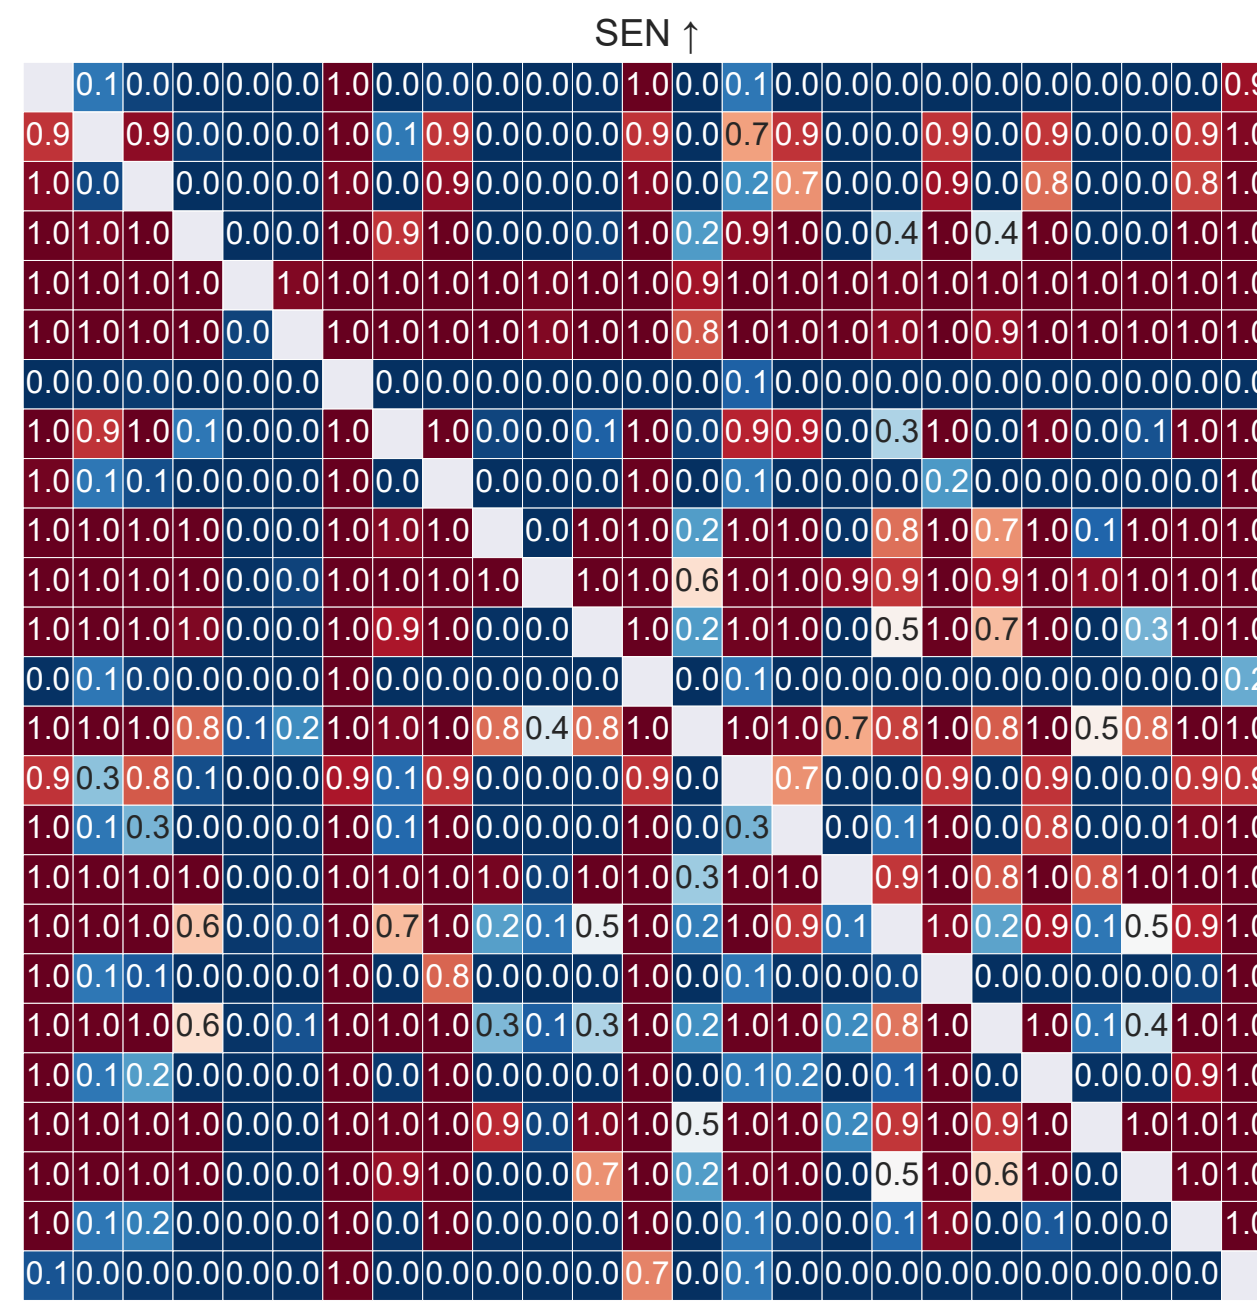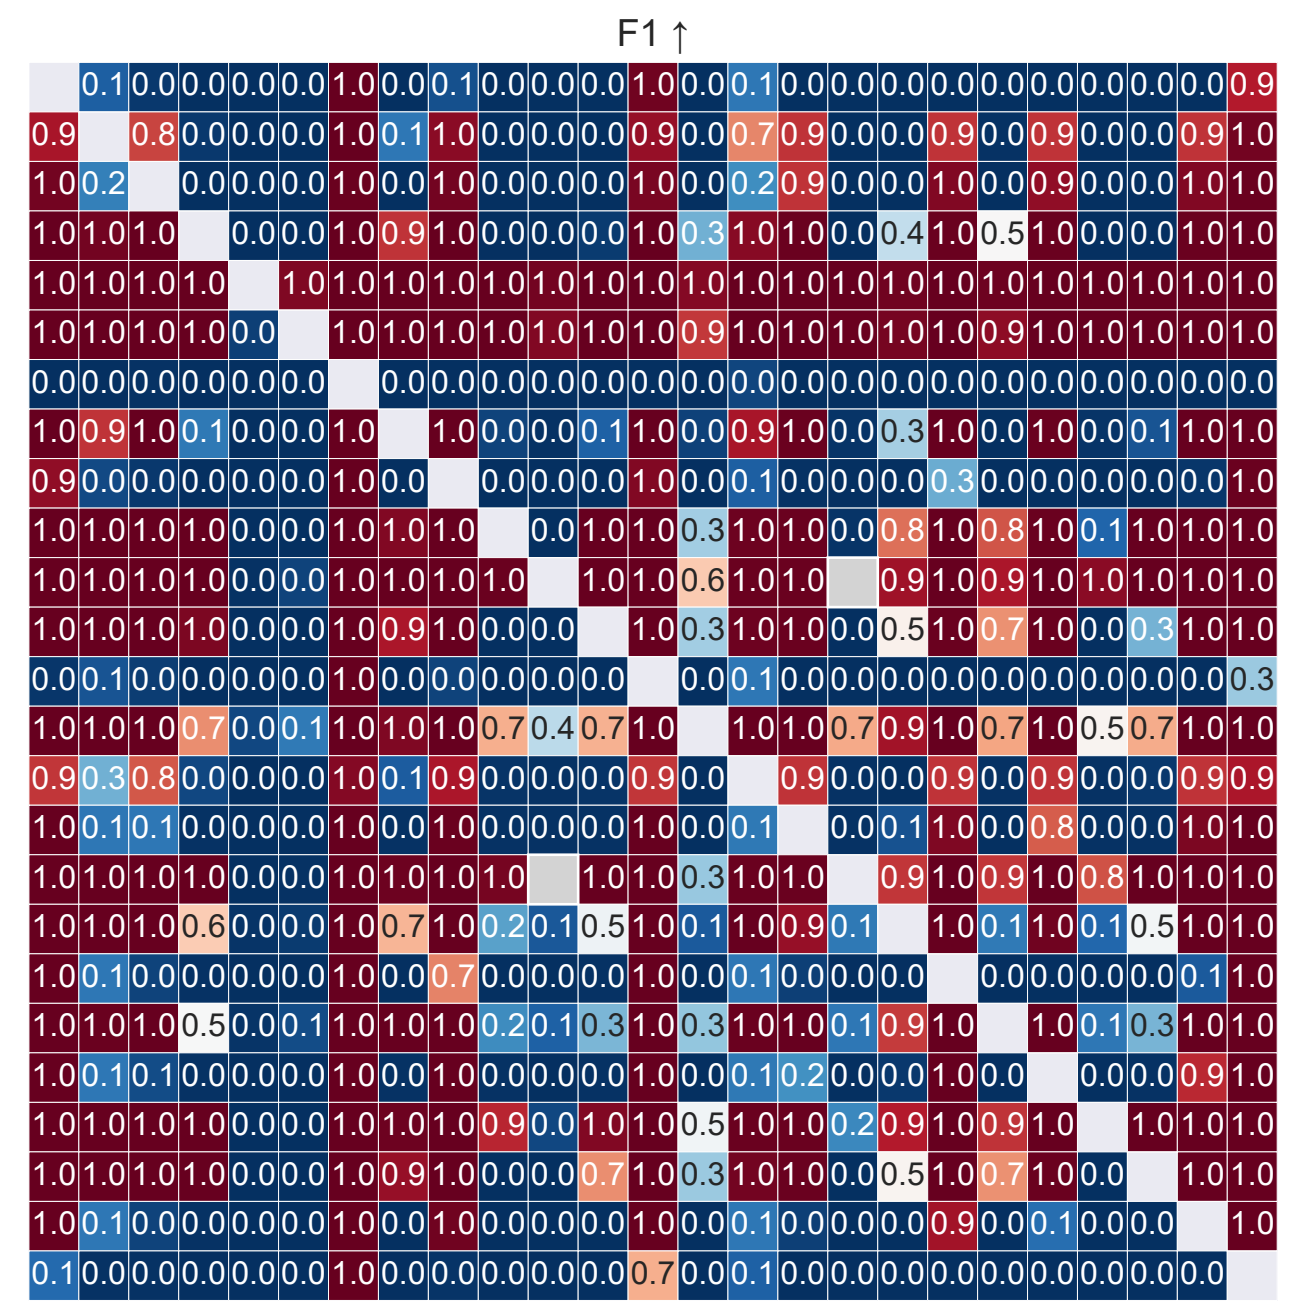

Supplement: supplementary_material [file sllpireheatmaps.pdf › supplementaries/sllpireheatmaps.pdf]

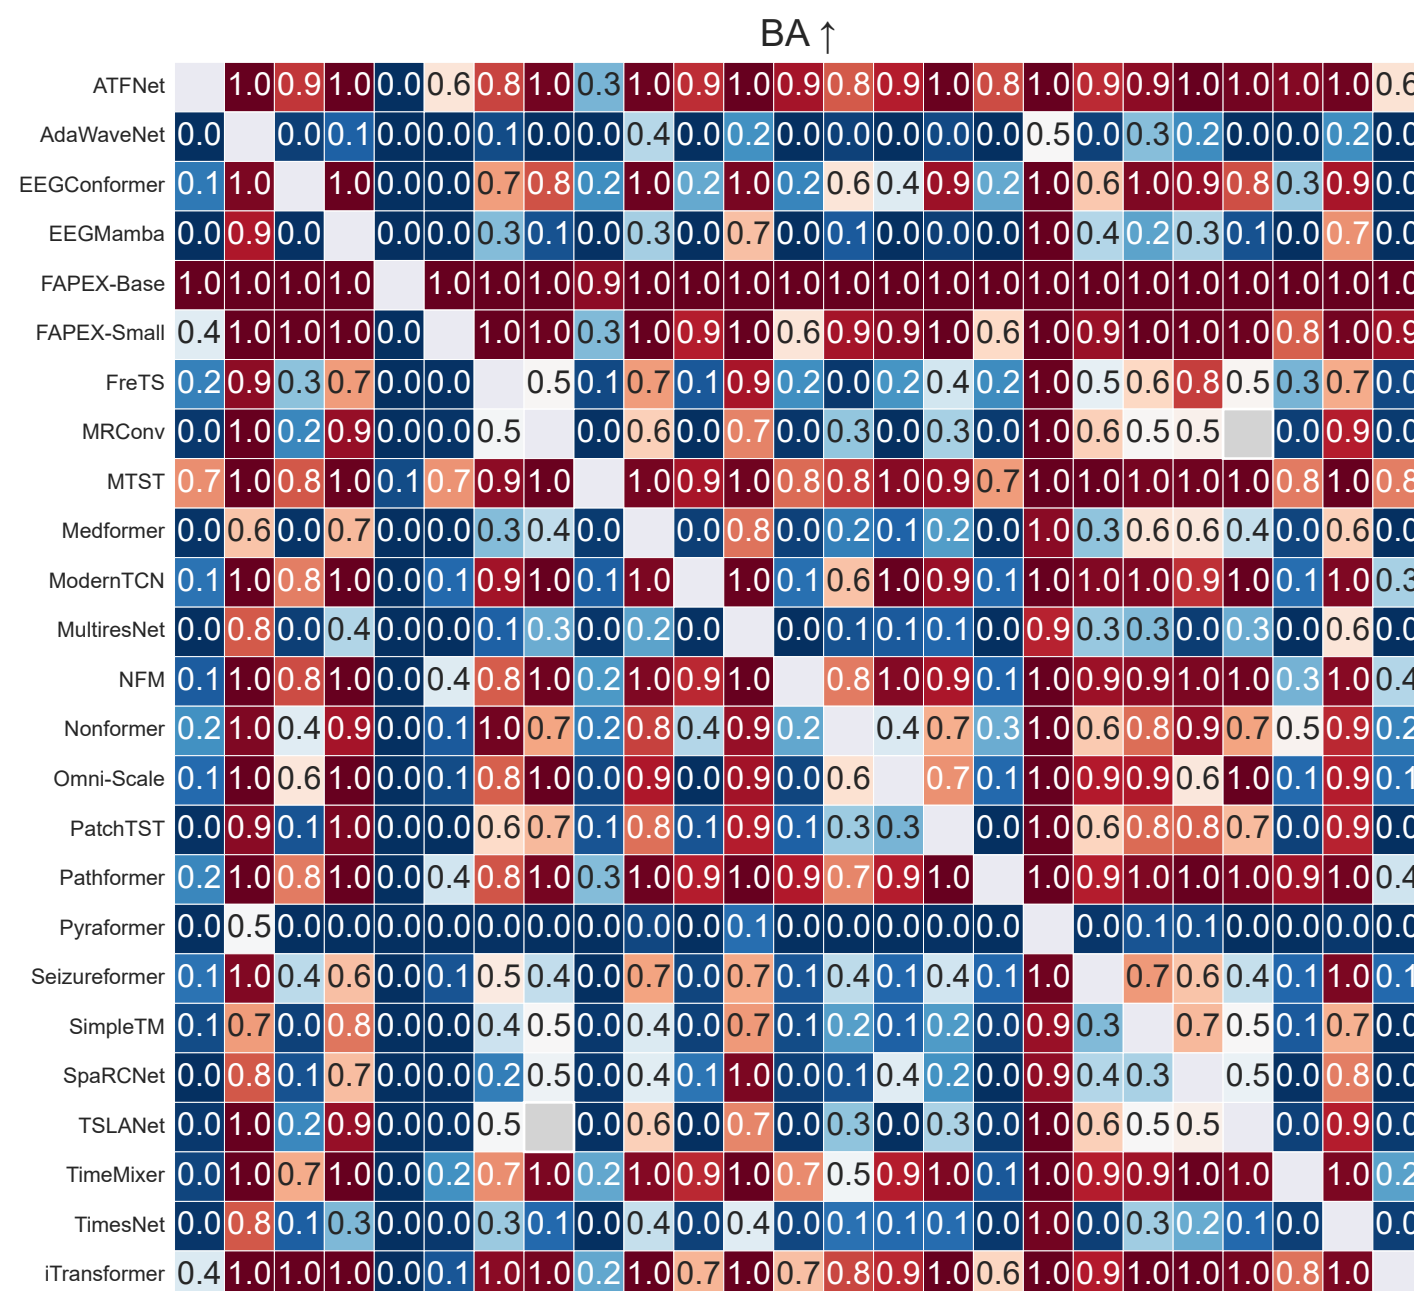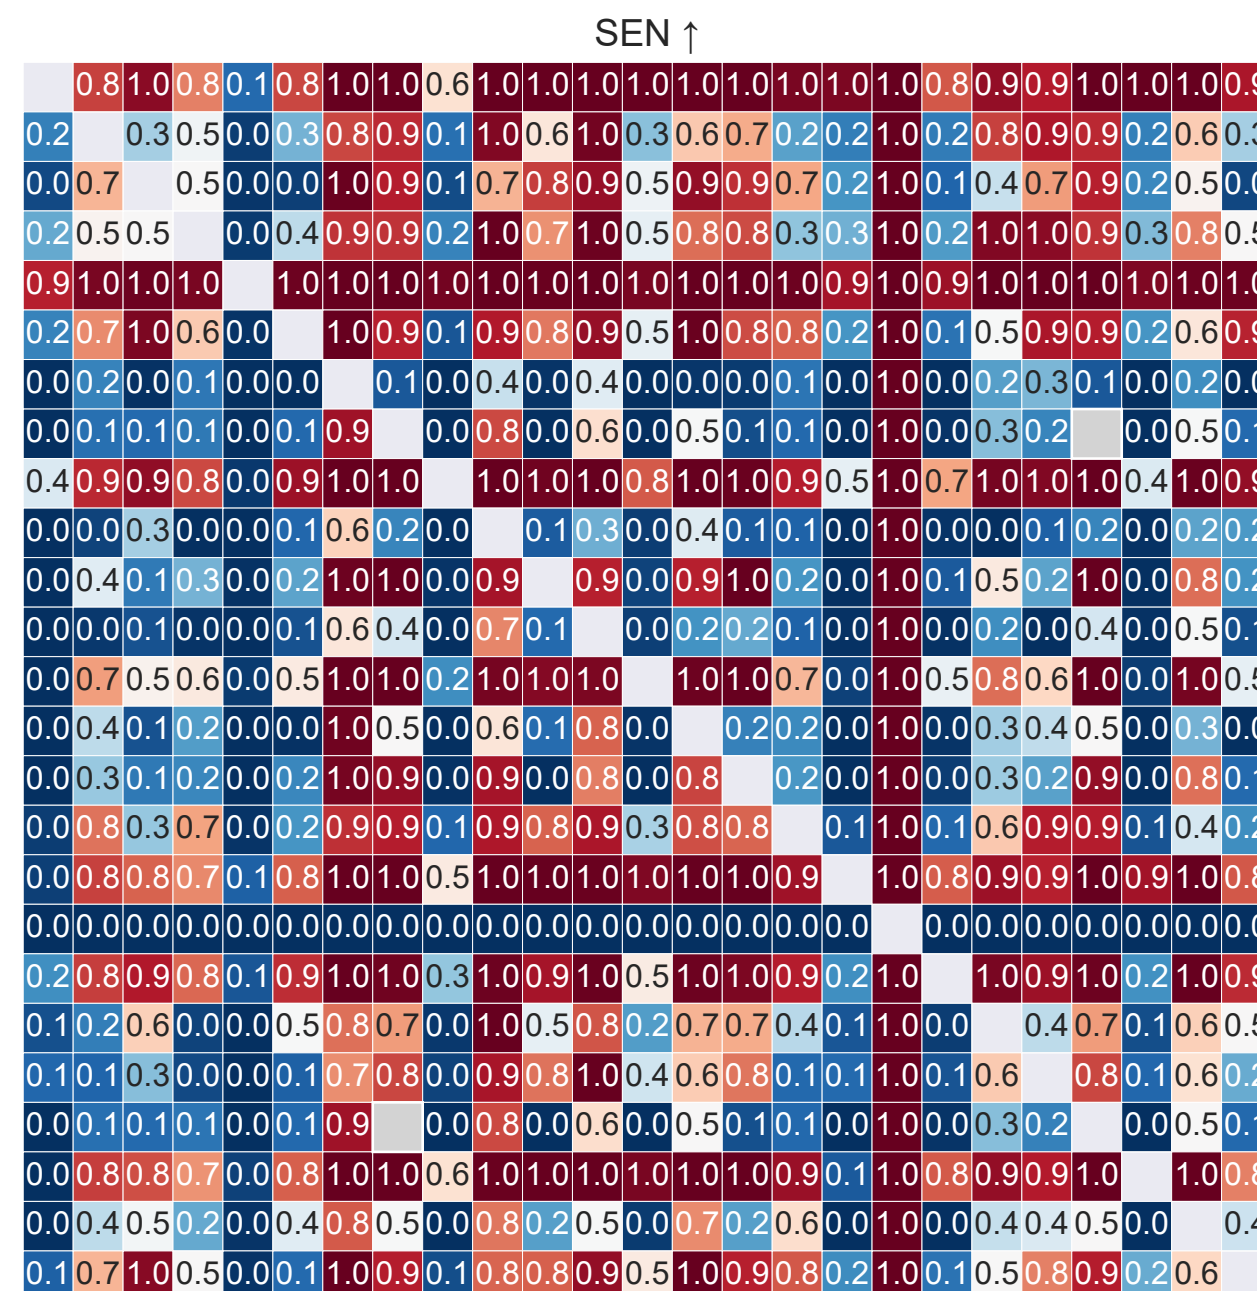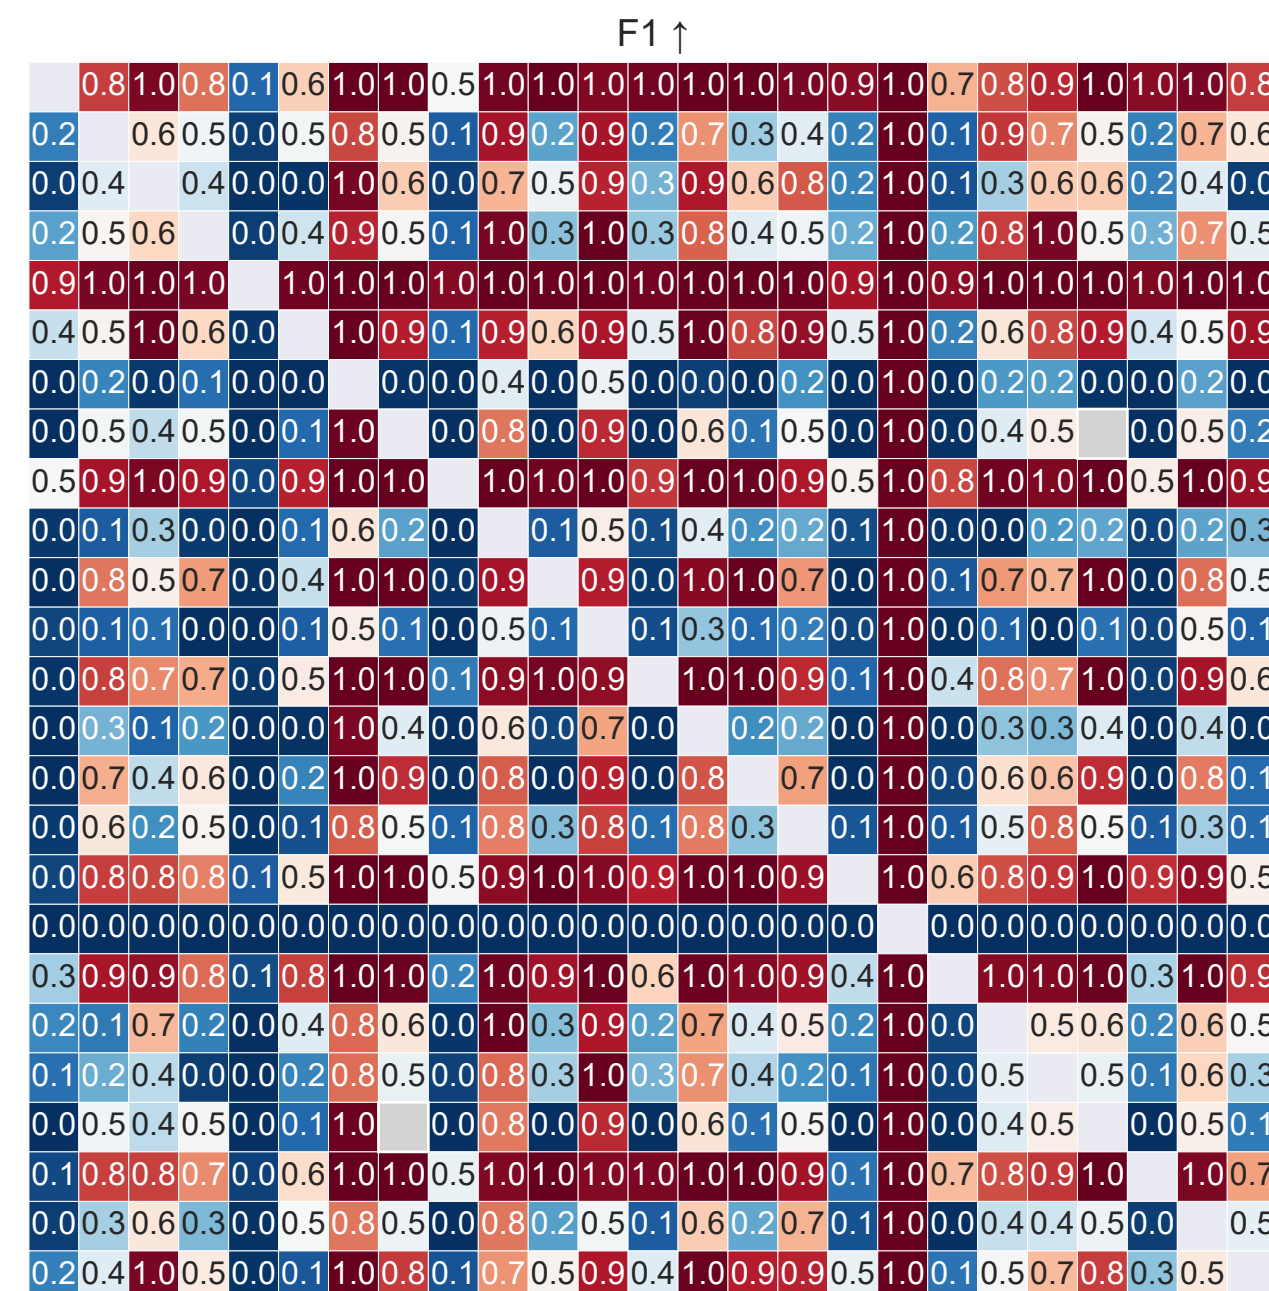

Supplement: supplementary_material [file slrespectheatmaps.pdf › supplementaries/slrespectheatmaps.pdf]
